# Supplementary material for: Complete genomic sequences of Propionibacterium freudenreichii phages from Swiss cheese reveal greater diversity than Cutibacterium (formerly Propionibacterium) acnes phages
Source: PubMed Central journal article supplement (PMC5831693; doi:10.1186/s12866-018-1159-y), 2018-03-01

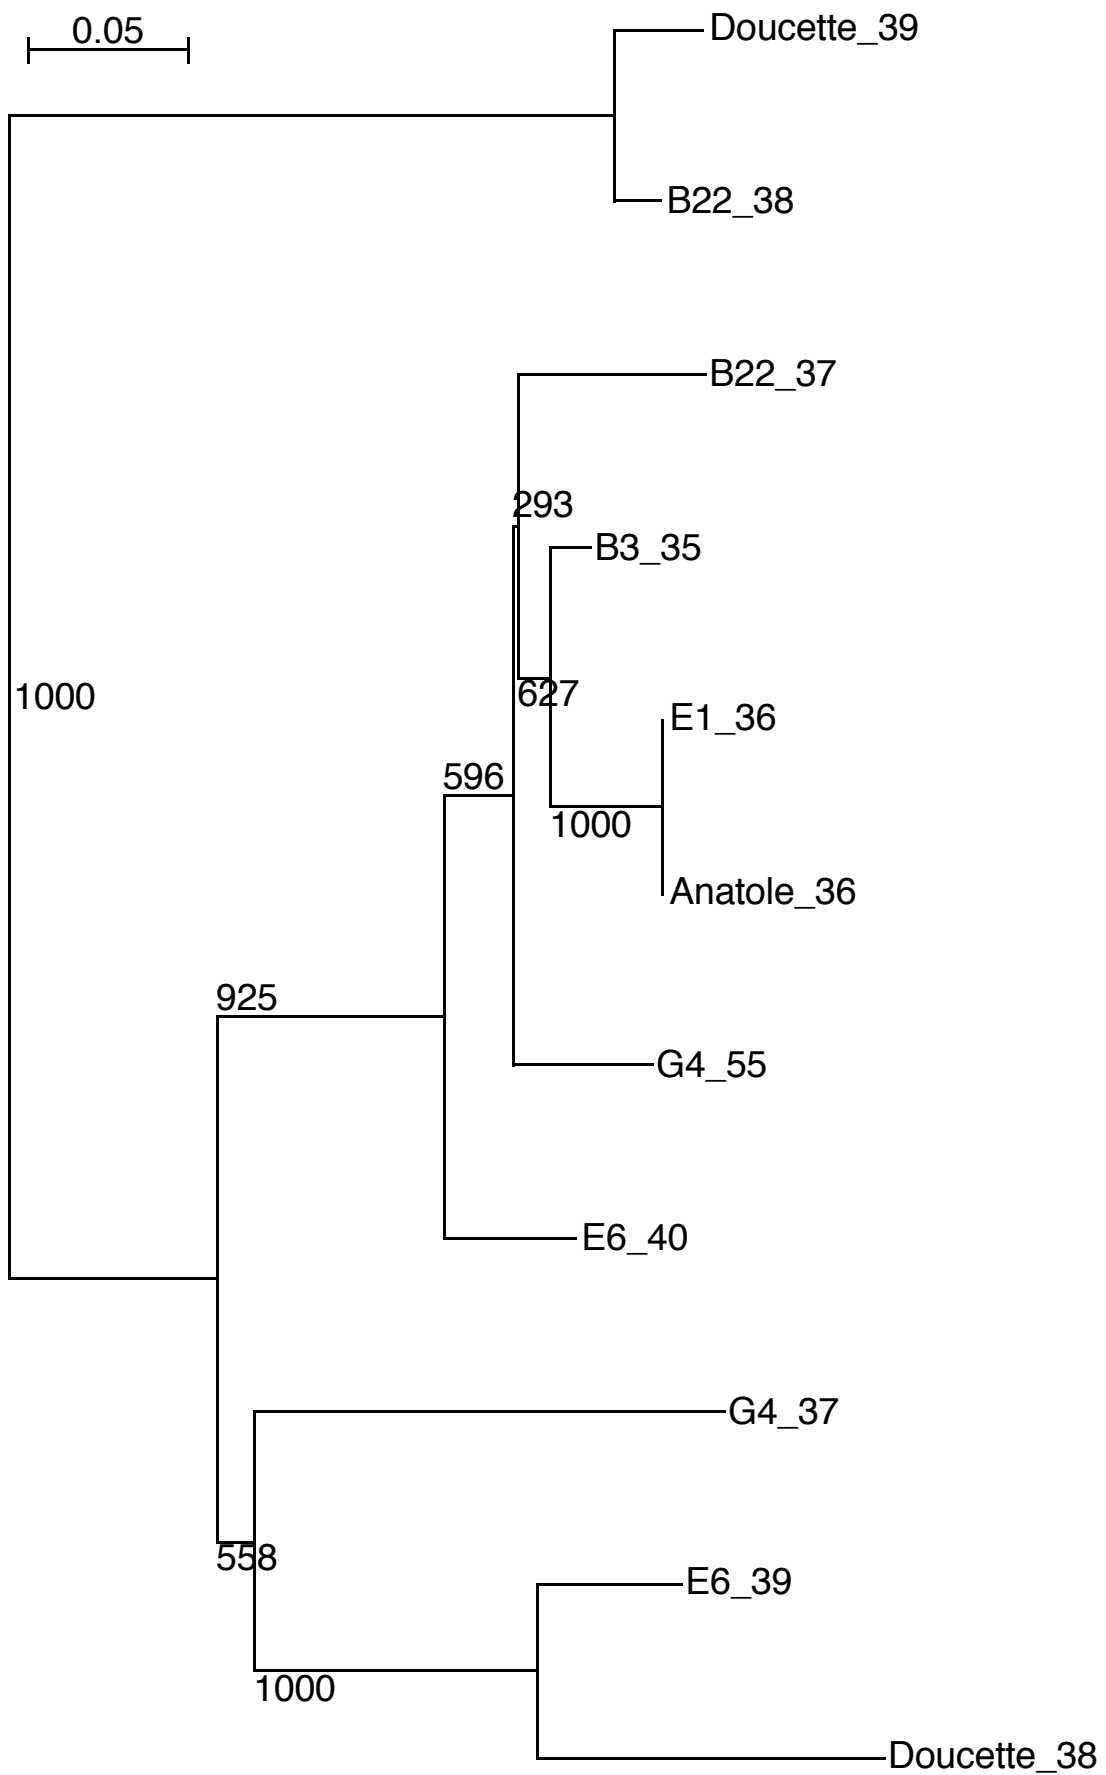

Supplement: 12866_2018_1159_MOESM7_ESM.pdf [file 12866_2018_1159_MOESM7_ESM.pdf]
